# Supplementary material
Source: Research Square preprint supplement (doi:10.21203/rs.3.rs-9558323/v1)
Supplement: Supplementary file 1 [file 6afa724ebc6f2967a5853606.docx]

**Supplementary Materials for “Towards inclusive developmental neuroimaging: personalising virtual-reality (VR) and diffuse optical tomography (DOT) assessment for neurodivergent young children”**

G. Serino1, S. Powell2,3, N. Aburumman4, T. Charman5, S. Dalvit-Menabe6, N., Everdell2,3, A. Hamilton7, S. Heraty1, E. Viding8, P. Pinti1, C. Bulgarelli1*

1Centre for Brain and Cognitive Development, Department of Psychological Sciences, Birkbeck, University of London

2Gowerlabs Ltd., Stoneleigh House, Mosslea Road, London SE20 7BW

3Department of Medical Physics and Biomedical Engineering, University College London

4Department of Computer Science, Brunel University

5 Department of Psychology, Institute of Psychiatry, Psychology & Neuroscience, King’s College London

6BabyBrains Limited

7Institute of Cognitive Neuroscience, University College London

8Clinical, Educational, and Health Psychology Research Department, University College London

*Corresponding author: Chiara Bulgarelli, c.bulgarelli@bbk.ac.uk

Table of Contents

[1. Pre-visit Likert-scale questionnaire 3](#_Toc227915755)

[2. Pre-visit open-ended questions 3](#_Toc227915756)

[3. Post-visit Likert-scale questionnaire 3](#_Toc227915757)

[4. Post-visit 1 open-ended questions 4](#_Toc227915758)

[5. Post-visit 2 open-ended questions 4](#_Toc227915759)

1. **Pre-visit Likert-scale questionnaire**

**How much fun do you think your child will have during their visit to the lab?**

| No fun at all | 1 | 2 | 3 | 4 | 5 | Lots of fun |
| --- | --- | --- | --- | --- | --- | --- |

**How much you think your child will be annoyed by/will not like the fNIRS cap?**

| Not annoyed by the cap at all | 1 | 2 | 3 | 4 | 5 | Highly annoyed by the cap |
| --- | --- | --- | --- | --- | --- | --- |

**How much you think your child will be annoyed by/will not like the VR room (CAVE)?**

| Not annoyed at all by the VR room | 1 | 2 | 3 | 4 | 5 | Highly annoyed by the VR room |
| --- | --- | --- | --- | --- | --- | --- |

**How much you think your child will be annoyed by/will not like the 3D glasses?**

| Not annoyed at all by the glasses | 1 | 2 | 3 | 4 | 5 | Highly annoyed by the glasses |
| --- | --- | --- | --- | --- | --- | --- |

**How much you think your child will be overwhelmed by the immersiveness of the CAVE?**

| Not overwhelmed at all | 1 | 2 | 3 | 4 | 5 | Highly overwhelmed |
| --- | --- | --- | --- | --- | --- | --- |

**How much you think coming to the lab for several visits will help your child get familiar with the testing environment?**

| Not helpful at all | 1 | 2 | 3 | 4 | 5 | Highly helpful |
| --- | --- | --- | --- | --- | --- | --- |

1. **Pre-visit open-ended questions**

**Please indicate your answer to the following three questions by typing your response into the text box. There is the option to skip any of the questions if you wish.**

1. **Are there any specific signs or symptoms that indicate when your child is distressed?**

|  |
| --- |

1. **Are there any particular toys, objects, videos, or actions that tend to calm your child when they are distressed?**

|  |
| --- |

1. **Is there any additional information or preferences about your child that would assist us in providing the best possible experience for them?**

|  |
| --- |

# **3. Post-visit Likert-scale questionnaire**

**How much fun do you think your child had during their visit to the lab?**

| No fun at all | 1 | 2 | 3 | 4 | 5 | Lots of fun |
| --- | --- | --- | --- | --- | --- | --- |

**How much you think your child was annoyed by/did not like the fNIRS cap?**

| Not annoyed by the cap at all | 1 | 2 | 3 | 4 | 5 | Highly annoyed by the cap |
| --- | --- | --- | --- | --- | --- | --- |

**How much you think your child was annoyed by/did not like the VR room (CAVE)?**

| Not annoyed at all by the VR room | 1 | 2 | 3 | 4 | 5 | Highly annoyed by the VR room |
| --- | --- | --- | --- | --- | --- | --- |

**How much you think your child was annoyed by/did not like the 3D glasses?**

| Not annoyed at all by the glasses | 1 | 2 | 3 | 4 | 5 | Highly annoyed by the glasses |
| --- | --- | --- | --- | --- | --- | --- |

**How much you think your child was overwhelmed by the immersiveness of the CAVE?**

| Not overwhelmed at all | 1 | 2 | 3 | 4 | 5 | Highly overwhelmed |
| --- | --- | --- | --- | --- | --- | --- |

**How much you think coming to the lab for several visits will help your child get familiar with the testing environment?**

| Not helpful at all | 1 | 2 | 3 | 4 | 5 | Highly helpful |
| --- | --- | --- | --- | --- | --- | --- |

**How likely are you to consider participating in another study similar to this one with your child?***

| Not likely at all | 1 | 2 | 3 | 4 | 5 | Highly likely |
| --- | --- | --- | --- | --- | --- | --- |

1. **Post-visit 1 open-ended questions**

**Please indicate your answer to the following three questions by typing your response into the text box. There is the option to skip any of the questions if you wish.**

1. **Are there any specific signs or symptoms of distress that your child showed during the testing session?**

|  |
| --- |

1. **What do you think we should change/tweak in the next testing session to make the experience more enjoyable for your child (i.e. entering the CAVE with the lights off, put the cap on outside the CAVE, etc..)**

|  |
| --- |

1. **Is there any additional information or preferences about your child that would assist us in providing the best possible experience for them?**

|  |
| --- |

*** visit 2 only**

# **5. Post-visit 2 open-ended questions**

**Please indicate your answer to the following questions by typing your response into the text box. There is the option to skip any of the questions if you wish.**

1. **Are there any specific signs or symptoms of distress that your child showed during the testing session?**

|  |
| --- |

1. **Are there any things that you think we did better or went better compared to the first visit?**

|  |
| --- |

1. **Is there any additional information or preferences about your child that would assist us in providing the best possible experience for them?**

|  |
| --- |
